# Supplementary material for: Association of Total and Trimester-Specific Gestational Weight Gain Rate with Early Infancy Weight Status: A Prospective Birth Cohort Study in China
Source: PubMed Central journal article supplement (PMC6413060; doi:10.3390/nu11020280), 2019-01-28
Supplement: nutrients-11-00280-s001.pdf [file nutrients-11-00280-s001.pdf]

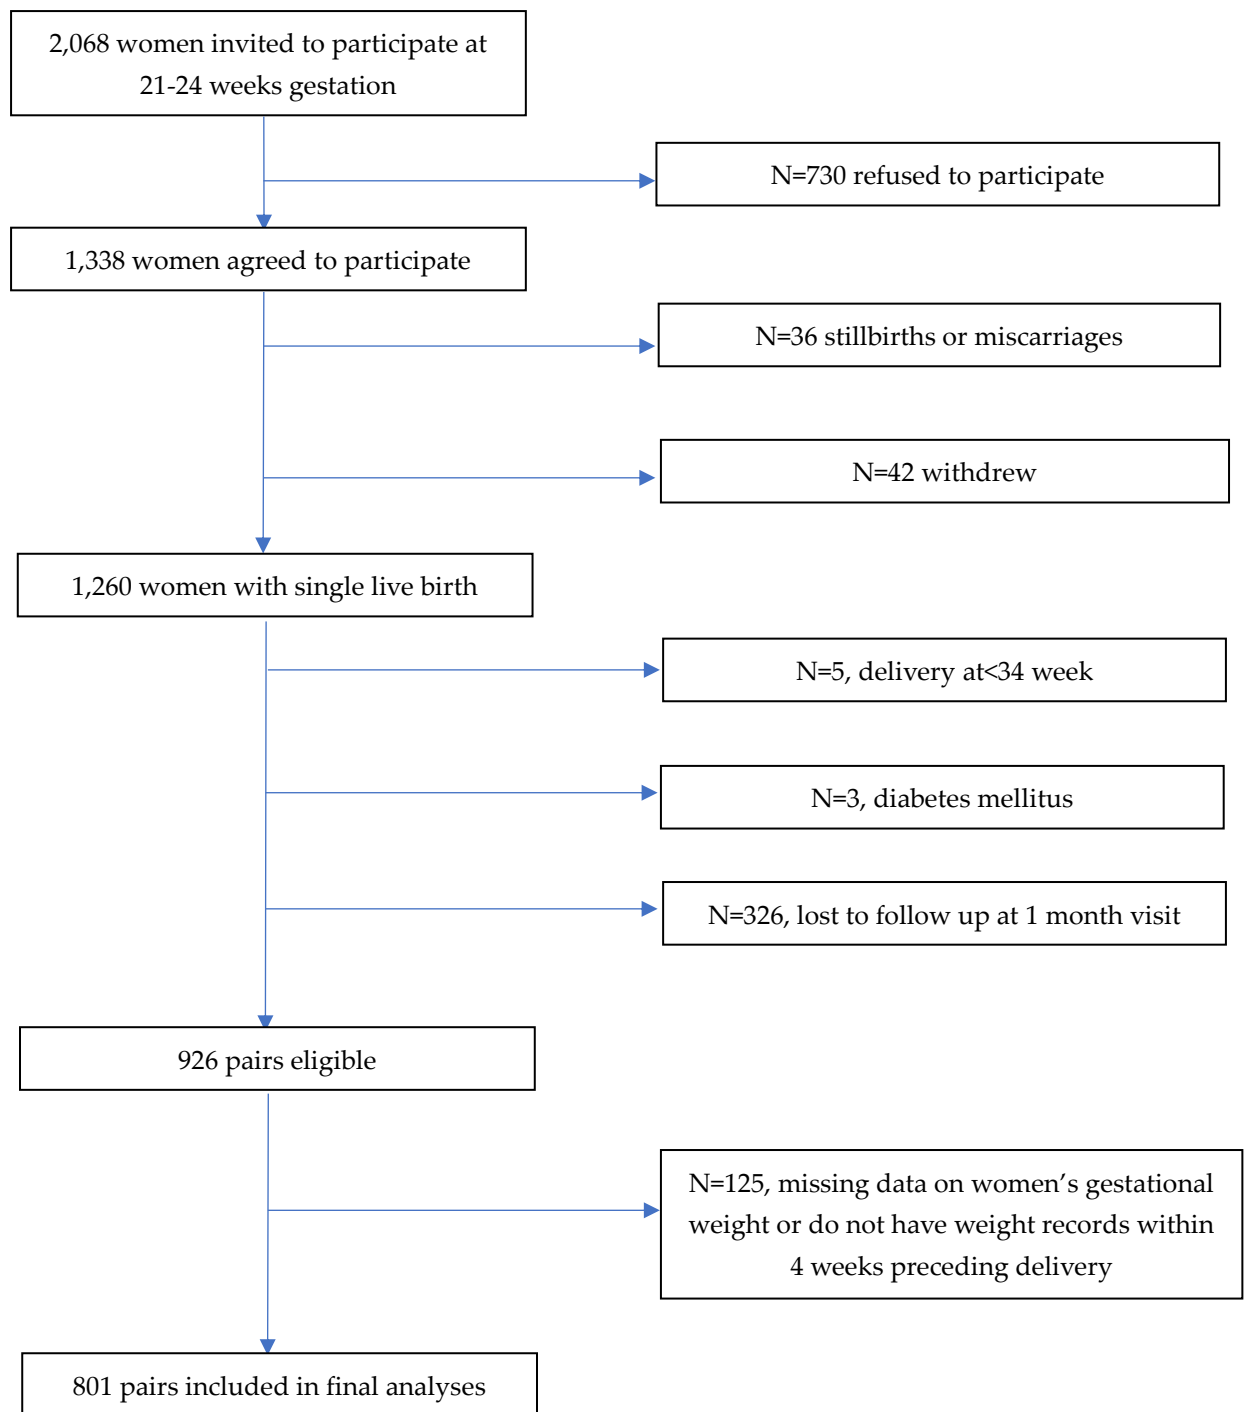

Figure S1. Study flow diagram.

**Table S1. Associations of total and trimester-specific gestational weight gain rate with infant weight-for-length z-score from birth to 6 months using linear mixed effects model**

|         | Total GWG rate<br>(kg/wk) | 1 <sup>st</sup> & 2 <sup>nd</sup> trimesters GWG rate<br>(kg/wk) | 3 <sup>rd</sup> trimester GWG rate<br>(kg/wk) |
|---------|---------------------------|------------------------------------------------------------------|-----------------------------------------------|
|         | $\beta$ (95% CI), (n=801) |                                                                  |                                               |
| WFLZ    |                           |                                                                  |                                               |
| Model 1 | 0.80 (0.29, 1.31) **      | 0.70 (0.22, 1.18) **                                             | 0.14 (-0.09, 0.36)                            |
| Model 2 | 0.96 (0.44, 1.47) ***     | 0.84 (0.36, 1.32) **                                             | 0.16 (-0.07, 0.38)                            |
| Model 3 | 0.96 (0.45, 1.47) ***     | 0.88 (0.40, 1.36) ***                                            | 0.14 (-0.08, 0.36) <sup>a</sup>               |

Model 1: adjusted for exact age of infants at each measurement

Model 2: Model 1 + pre-pregnancy body mass index

Model 3: Model 2 + maternal age, race, parity, education, household income, smoking status, paternal body mass index

<sup>a</sup>: Further adjust 1<sup>st</sup> & 2<sup>nd</sup> trimesters GWG rate, gestational diabetes

WFLZ, weight-for-length z-score; \*\*: p<0.01, \*\*\*: p<0.001

**Table S2. Associations of total and trimester-specific gestational weight gain rate with infant growth measures from birth to 6 months using linear mixed effects model, further adjusting for infant feeding style, television watching and secondhand smoking exposure at 1 month.**

|      | Total GWG rate<br>(kg/wk) | 1 <sup>st</sup> & 2 <sup>nd</sup> trimesters GWG rate<br>(kg/wk) | 3 <sup>rd</sup> trimester GWG rate<br>(kg/wk) <sup>a</sup> |
|------|---------------------------|------------------------------------------------------------------|------------------------------------------------------------|
|      | $\beta$ (95% CI), (n=663) |                                                                  |                                                            |
| BMIZ | 1.32 (0.83, 1.82) ***     | 1.31 (0.85, 1.77) ***                                            | 0.08 (-0.14, 0.29)                                         |
| WFLZ | 0.95 (0.44, 1.46) ***     | 0.87 (0.39, 1.35) ***                                            | 0.14 (-0.09, 0.36)                                         |
| WFAZ | 1.20 (0.76, 1.63) ***     | 1.08 (0.68, 1.49) ***                                            | 0.07 (-0.12, 0.26)                                         |
| LFAZ | 0.51 (-0.04, 1.07)        | 0.41 (-0.11, 0.93)                                               | -0.03 (-0.28, 0.21)                                        |

Adjusted for exact age of infants at each measurement, pre-pregnancy body mass index, maternal age, race, parity, education, household income, smoking status, paternal body mass index, infant feeding style at 1 month, infant television watching status at 1 month, second hand smoking exposure at 1 month.

<sup>a</sup>: Further adjust 1<sup>st</sup> & 2<sup>nd</sup> trimesters GWG rate, gestational diabetes

BMIZ, body mass index-for-age and sex z-score; WFAZ, weight-for-age z-score; LFAZ, length-for-age z-score; WFLZ, weight-for-length z-score; \*\*\*: p<0.001

**Table S3. Associations of pre-pregnancy weight status with infant growth measures from birth to 6 months**

| BMIZ     | Pre-pregnancy BMI (kg/m <sup>2</sup> ) |
|----------|----------------------------------------|
|          | $\beta$ (95% CI), (n=801)              |
| 0 month  | 0.20 (0.07, 0.33)                      |
| 1 month  | 0.20 (0.09, 0.31)                      |
| 3 months | 0.23 (0.11, 0.35)                      |
| 6 months | 0.24 (0.11, 0.38)                      |

Adjusted for gestational weight gain rate, maternal age, race, parity, education, household income, smoking status, paternal body mass index.

BMI, body mass index; BMIZ, body mass index-for-age and sex z-score
